# Supplementary material for: The Associations of Plasma Biomarkers of Inflammation With Histopathologic Lesions, Kidney Disease Progression, and Mortality—The Boston Kidney Biopsy Cohort Study
Source: PubMed Central journal article supplement — Kidney Int Rep. 2021 Jan 6;6(3):685–94. doi: 10.1016/j.ekir.2020.12.025 (PMC7938082; doi:10.1016/j.ekir.2020.12.025), 2021-01-06
Supplement: mmc1.pdf [file mmc1.pdf]

## Supplemental Data

### **The Associations of Plasma Biomarkers of Inflammation with Histopathologic Lesions, Kidney Disease Progression, and Mortality – The Boston Kidney Biopsy Cohort Study**

Anand Srivastava, MD, MPH<sup>1\*</sup>; Insa M. Schmidt, MD, MPH<sup>2,3\*</sup>; Ragnar Palsson, MD<sup>3</sup>; Astrid Weins, MD, PhD<sup>4</sup>; Joseph V. Bonventre, MD, PhD<sup>3</sup>; Venkata Sabbiseti, PhD<sup>3</sup>; Isaac E. Stillman, MD<sup>5</sup>; Helmut G. Rennke, MD<sup>4</sup>; Sushrut S. Waikar, MD, MPH<sup>2,3</sup>

<sup>1</sup>Center for Translational Metabolism and Health, Institute for Public Health and Medicine, Division of Nephrology and Hypertension, Northwestern University Feinberg School of Medicine, Chicago, IL

<sup>2</sup>Renal Section, Department of Medicine, Boston University Medical Center, Boston, MA

<sup>3</sup>Renal Division, Brigham & Women's Hospital, Boston, MA

<sup>4</sup>Pathology Department, Brigham & Women's Hospital, Boston, MA

<sup>5</sup>Department of Pathology, Beth Israel Deaconess Medical Center, Boston, MA

\*Both authors contributed to this work equally

#### **Tables:**

**Supplemental Table 1.** Histopathologic scoring system for light microscopy

**Supplemental Table 2.** Absolute plasma biomarker concentrations by primary clinicopathologic diagnosis

**Supplemental Table 3.** Associations of sTNFR-1, sTNFR-2, YKL-40, MCP-1, and suPAR with adverse clinical outcomes by primary clinicopathologic diagnosis

**Supplemental Table 4.** Competing risk analyses for the associations of sTNFR-1, sTNFR-2, YKL-40, MCP-1, and suPAR with ESKD

**Supplemental Table 5.** Associations of sTNFR-1, sTNFR-2, YKL-40, MCP-1, and suPAR with adverse clinical outcomes after adjustment for immunosuppressive medications

#### **Figures:**

**Supplemental Figure 1.** sTNFR-1, sTNFR-2, YKL-40, MCP-1, and suPAR associate with tubulointerstitial lesions

**Supplemental Figure 2.** sTNFR-1, sTNFR-2, YKL-40, MCP-1, and suPAR associate with glomerular lesions

**Supplemental Figure 3.** sTNFR-1, sTNFR-2, YKL-40, MCP-1, and suPAR associate with microvascular lesions

**Supplemental Table 1. Histopathologic scoring system for light microscopy**

| <b>Histologic Feature</b>                 | <b>Scoring</b>                                            |
|-------------------------------------------|-----------------------------------------------------------|
| Mesangial Matrix Expansion                | 0 (none), 1 (mild,), 2 (moderate), 3 (severe)             |
| Global Glomerulosclerosis                 | 0 ( $\leq 10\%$ ), 1 (11-25%), 2 (26-50%), 3 ( $> 50\%$ ) |
| Segmental Glomerulosclerosis              | 0 ( $\leq 10\%$ ), 1 (11-25%), 2 (26-50%), 3 ( $> 50\%$ ) |
| Endocapillary Glomerular Inflammation     | 0 ( $\leq 10\%$ ), 1 (11-25%), 2 (26-50%), 3 ( $> 50\%$ ) |
| Extracapillary Cellular Crescents         | 0 ( $\leq 10\%$ ), 1 (11-25%), 2 (26-50%), 3 ( $> 50\%$ ) |
| Focal Glomerular Necrosis                 | 0 ( $\leq 10\%$ ), 1 (11-25%), 2 (26-50%), 3 ( $> 50\%$ ) |
| Fibrocellular Crescents                   | 0 ( $\leq 10\%$ ), 1 (11-25%), 2 (26-50%), 3 ( $> 50\%$ ) |
| Interstitial Fibrosis and Tubular Atrophy | 0 ( $\leq 10\%$ ), 1 (11-25%), 2 (26-50%), 3 ( $> 50\%$ ) |
| Inflammation, Non-Fibrosed Interstitium   | 0 ( $\leq 10\%$ ), 1 (11-25%), 2 (26-50%), 3 ( $> 50\%$ ) |
| Inflammation, Fibrosed Interstitium       | 0 ( $\leq 10\%$ ), 1 (11-25%), 2 (26-50%), 3 ( $> 50\%$ ) |
| Acute Tubular Injury                      | 0 (none), 1 (mild,), 2 (moderate), 3 (severe)             |
| Arterial Sclerosis                        | 0 (none), 1 (mild,), 2 (moderate), 3 (severe)             |
| Arteriolar Sclerosis                      | 0 (none), 1 (mild,), 2 (moderate), 3 (severe)             |

Percentages were calculated by assessing affected areas over total cortical volume or glomeruli affected.

References used to develop scoring system:

Mauer, S, Steffes, M, Ellis, E, Sutherland, D, Brown, D, Goetz, F: Structural-Functional Relationships in Diabetic Nephropathy. *J Clin Invest*, 74: 1143-1155, 1984.

Bajema, I, ECH, H, Hansen, B, Hermans, J, Noel, L, Waldherr, R, et al.: The renal histopathology in systemic vasculitis: an international survey study of inter- and intra-observer agreement. *Nephrol Dial Transplant*, 11: 1989-1995, 1996.

Racusen, LC, Solez, K, Colvin, RB, Bonsib, SM, Castro, MC, Cavallo, T, et al.: The Banff 97 working classification of renal allograft pathology. *Kidney Int*, 55: 713-723, 1999.

Weening, J, D'Agati, V, Schwartz, M, Seshan, S, Alpers, C, Appel, G, et al.: The Classification of Glomerulonephritis in Systemic Lupus Erythematosus Revisited. *Journal of the American Society of Nephrology*, 15: 241-250, 2004

D'Agati, VD, Fogo, AB, Bruijn, JA, Jennette, JC: Pathologic classification of focal segmental glomerulosclerosis: a working proposal. *American Journal of Kidney Diseases*, 43: 368-382, 2004.

Working Group of the International IgA Nephropathy Network and the Renal Pathology Society: Roberts, IS, Cook, HT, Troyanov, S, Alpers, CE, Amore, A, Barratt, J, et al.: The Oxford classification of IgA nephropathy: pathology definitions, correlations, and reproducibility. *Kidney Int*, 76: 546-556, 2009.

Tervaert, TW, Mooyaart, AL, Amann, K, Cohen, AH, Cook, HT, Drachenberg, CB, et al.: Pathologic classification of diabetic nephropathy. *J Am Soc Nephrol*, 21: 556-563, 2010.

Berden, AE, Ferrario, F, Hagen, EC, Jayne, DR, Jennette, JC, Joh, K, et al.: Histopathologic classification of ANCA-associated glomerulonephritis. *J Am Soc Nephrol*, 21: 1628-1636, 2010.

Farris, AB, Adams, CD, Brousaides, N, Della Pelle, PA, Collins, AB, Moradi, E, et al.: Morphometric and visual evaluation of fibrosis in renal biopsies. *J Am Soc Nephrol*, 22: 176-186, 2011.

**Supplemental Table 2. Absolute plasma biomarker concentrations by primary clinicopathologic diagnosis**

|                                       | <b>Proliferative glomerulonephritis</b> | <b>Non-proliferative glomerulopathy</b> | <b>Paraprotein disease</b> | <b>Diabetic nephropathy</b> | <b>Vascular disease</b> | <b>Tubulointerstitial disease</b> | <b>Advanced glomerulosclerosis</b> | <b>Other</b>            |
|---------------------------------------|-----------------------------------------|-----------------------------------------|----------------------------|-----------------------------|-------------------------|-----------------------------------|------------------------------------|-------------------------|
| <b>eGFR, ml/min/1.73m<sup>2</sup></b> | 66.9 ± 38.3                             | 74.1 ± 36.3                             | 56.1 ± 30.4                | 37.1 ± 20.6                 | 44.5 ± 28.3             | 25.5 ± 16.5                       | 42.9 ± 27.0                        | 79.0 ± 35.2             |
| <b>Proteinuria, g/g creatinine</b>    | 1.5<br>[0.7 – 3.3]                      | 3.7<br>[1.8 – 7.2]                      | 2.4<br>[0.7 – 5.6]         | 3.5<br>[0.8 – 6.7]          | 0.6<br>[0.2 – 2.1]      | 0.4<br>[0.2 – 1.4]                | 1.0<br>[0.2 – 3.6]                 | 0.1<br>[0.0 – 0.4]      |
| <b>sTNFR-1, pg/ml</b>                 | 864<br>[404 – 1835]                     | 772<br>[484 – 1654]                     | 778<br>[448 – 1826]        | 1921<br>[1046 – 2806]       | 900<br>[578 – 2178]     | 1494<br>[688 – 3297]              | 1254<br>[531 – 2351]               | 298<br>[239 – 1237]     |
| <b>sTNFR-2, pg/ml</b>                 | 5446<br>[2973 – 9587]                   | 6904<br>[3745 – 10809]                  | 4238<br>[2762 – 6761]      | 8352<br>[5351 – 14463]      | 6083<br>[3431 – 16421]  | 8034<br>[4841 – 13922]            | 6567<br>[3929 – 11897]             | 2017<br>[1495 – 8858]   |
| <b>YKL-40, ng/ml</b>                  | 36.1<br>[22 – 73]                       | 53.2<br>[26 – 101]                      | 59.6<br>[21 – 124]         | 69.5<br>[50 – 117]          | 65.5<br>[30 – 92]       | 73.3<br>[37 – 157]                | 53.7<br>[36 – 107]                 | 23.5<br>[15 – 59]       |
| <b>MCP-1, pg/ml</b>                   | 122.2<br>[84 – 189]                     | 134.2<br>[99 – 206]                     | 138.7<br>[100 – 198]       | 160.9<br>[114 – 206]        | 157.3<br>[99 – 197]     | 136.5<br>[96 – 182]               | 129.8<br>[102 – 175]               | 103.1<br>[69 – 167]     |
| <b>suPAR, pg/ml</b>                   | 2730.3<br>[1553 – 5833]                 | 2644.8<br>[1646 – 4994]                 | 2480<br>[1878 – 5520]      | 4913.4<br>[1991 – 7220]     | 3156.2<br>[1747 – 6305] | 5223.7<br>[2293 – 11693]          | 3698.8<br>[2112 – 6725]            | 2300.8<br>[1613 – 6278] |

Data presented as mean ± standard deviation, median [interquartile range]

**Supplemental Table 3. Associations of sTNFR-1, sTNFR-2, YKL-40, MCP-1, and suPAR with adverse clinical outcomes by primary clinicopathologic diagnosis**

|                                    | Events | HR (95% CI)        | P-interaction |
|------------------------------------|--------|--------------------|---------------|
| <b>Kidney disease progression*</b> |        |                    |               |
| <b>sTNFR1</b>                      |        |                    |               |
| Glomerulopathy                     | 78     | 1.36 (1.09 – 1.71) | 0.51          |
| Other diagnoses                    | 103    | 1.23 (0.98 – 1.54) |               |
| <b>sTNFR2</b>                      |        |                    |               |
| Glomerulopathy                     | 78     | 1.52 (1.18 – 1.94) | 0.93          |
| Other diagnoses                    | 103    | 1.25 (0.98 – 1.60) |               |
| <b>YKL-40</b>                      |        |                    |               |
| Glomerulopathy                     | 75     | 1.31 (1.06 – 1.62) | 0.99          |
| Other diagnoses                    | 95     | 1.01 (0.82 – 1.24) |               |
| <b>MCP-1</b>                       |        |                    |               |
| Glomerulopathy                     | 78     | 1.34 (1.04 – 1.72) | 0.50          |
| Other diagnoses                    | 103    | 1.33 (0.97 – 1.82) |               |
| <b>suPAR</b>                       |        |                    |               |
| Glomerulopathy                     | 74     | 1.06 (0.93 – 1.21) | 0.13          |
| Other diagnoses                    | 101    | 1.19 (1.03 – 1.38) |               |
| <b>ESKD</b>                        |        |                    |               |
| <b>sTNFR1</b>                      |        |                    |               |
| Glomerulopathy                     | 50     | 1.31 (0.96 – 1.80) | 0.64          |
| Other diagnoses                    | 73     | 1.25 (0.98 – 1.60) |               |
| <b>sTNFR2</b>                      |        |                    |               |
| Glomerulopathy                     | 50     | 1.43 (1.01 – 2.01) | 0.77          |
| Other diagnoses                    | 73     | 1.33 (0.99 – 1.79) |               |
| <b>YKL-40</b>                      |        |                    |               |
| Glomerulopathy                     | 49     | 1.18 (0.90 – 1.54) | 0.34          |
| Other diagnoses                    | 67     | 1.13 (0.87 – 1.46) |               |
| <b>MCP-1</b>                       |        |                    |               |
| Glomerulopathy                     | 50     | 1.53 (1.08 – 2.16) | 0.80          |
| Other diagnoses                    | 73     | 1.41 (0.99 – 2.02) |               |
| <b>suPAR</b>                       |        |                    |               |
| Glomerulopathy                     | 48     | 1.02 (0.86 – 1.21) | 0.06          |
| Other diagnoses                    | 73     | 1.30 (1.10 – 1.52) |               |
| <b>Mortality</b>                   |        |                    |               |
| <b>sTNFR1</b>                      |        |                    |               |
| Glomerulopathy                     | 35     | 1.27 (0.90 – 1.79) | 0.53          |
| Other diagnoses                    | 48     | 0.96 (0.76 – 1.21) |               |
| <b>sTNFR2</b>                      |        |                    |               |
| Glomerulopathy                     | 35     | 1.57 (1.09 – 2.26) | 0.86          |
| Other diagnoses                    | 48     | 1.06 (0.82 – 1.36) |               |
| <b>YKL-40</b>                      |        |                    |               |
| Glomerulopathy                     | 35     | 1.35 (0.98 – 1.86) | 0.16          |
| Other diagnoses                    | 40     | 1.58 (1.11 – 2.24) |               |
| <b>MCP-1</b>                       |        |                    |               |
| Glomerulopathy                     | 35     | 1.26 (0.88 – 1.81) | 0.39          |
| Other diagnoses                    | 47     | 1.59 (1.03 – 2.47) |               |
| <b>suPAR</b>                       |        |                    |               |
| Glomerulopathy                     | 34     | 0.99 (0.81 – 1.19) | 0.29          |
| Other diagnoses                    | 46     | 1.15 (0.93 – 1.43) |               |

Model is stratified by site and adjusted for age, sex, race, natural log transformed proteinuria, and baseline eGFR  
HR per doubling of biomarker

Glomerulopathy is defined as proliferative glomerulonephritis, non-proliferative glomerulopathy, or paraprotein-related disease

\*Kidney disease progression defined as  $\geq 40\%$  eGFR decline or ESKD

**Supplemental Table 4. Competing risk analyses for the associations of sTNFR-1, sTNFR-2, YKL-40, MCP-1, and suPAR with ESKD**

|                | Events | Model 1<br>HR (95%CI) | Model 2<br>HR (95% CI) | Model 3<br>HR (95% CI) |
|----------------|--------|-----------------------|------------------------|------------------------|
| <b>sTNFR-1</b> |        |                       |                        |                        |
| ESKD           | 124    | 1.81 (1.57 – 2.09)    | 1.78 (1.53 – 2.08)     | 1.25 (1.03 – 1.51)     |
| <b>sTNFR-2</b> |        |                       |                        |                        |
| ESKD           | 124    | 1.93 (1.65 – 2.25)    | 1.91 (1.59 – 2.30)     | 1.34 (1.06 – 1.70)     |
| <b>YKL-40</b>  |        |                       |                        |                        |
| ESKD           | 117    | 1.52 (1.34 – 1.74)    | 1.54 (1.32 – 1.81)     | 1.16 (0.97 – 1.39)     |
| <b>MCP-1</b>   |        |                       |                        |                        |
| ESKD           | 124    | 1.27 (1.07 – 1.50)    | 1.25 (1.00 – 1.55)     | 1.46 (1.15 – 1.87)     |
| <b>suPAR</b>   |        |                       |                        |                        |
| ESKD           | 122    | 1.27 (1.15 – 1.39)    | 1.25 (1.13 – 1.38)     | 1.12 (1.01 – 1.24)     |

Death is treated as the competing risk.

Model 1 is unadjusted

Model 2 is adjusted for age, sex, race, natural log transformed proteinuria, and primary clinicopathologic diagnosis

Model 3 is Model 2 and further adjusted for baseline eGFR

HR per doubling of biomarker

**Supplemental Table 5. Associations of sTNFR-1, sTNFR-2, YKL-40, MCP-1, and suPAR with adverse clinical outcomes after adjustment for immunosuppressive medications**

|                             | <b>Events</b> | <b>Model 3<br/>HR (95% CI)</b> | <b>Model 3 + IS or CS<br/>HR (95% CI)</b> |
|-----------------------------|---------------|--------------------------------|-------------------------------------------|
| <b>sTNFR-1</b>              |               |                                |                                           |
| Kidney disease progression* | 182           | 1.33 (1.13 – 1.56)             | 1.32 (1.12 – 1.55)                        |
| ESKD                        | 124           | 1.31 (1.07 – 1.60)             | 1.28 (1.04 – 1.57)                        |
| Mortality                   | 85            | 1.17 (0.94 – 1.46)             | 1.16 (0.93 – 1.44)                        |
| <b>sTNFR-2</b>              |               |                                |                                           |
| Kidney disease progression* | 182           | 1.47 (1.24 – 1.75)             | 1.45 (1.21 – 1.72)                        |
| ESKD                        | 124           | 1.50 (1.18 – 1.90)             | 1.44 (1.14 – 1.83)                        |
| Mortality                   | 85            | 1.33 (1.04 – 1.71)             | 1.28 (1.01 – 1.64)                        |
| <b>YKL-40</b>               |               |                                |                                           |
| Kidney disease progression* | 171           | 1.21 (1.04 – 1.40)             | 1.19 (1.03 – 1.38)                        |
| ESKD                        | 117           | 1.19 (0.99 – 1.44)             | 1.17 (0.97 – 1.41)                        |
| Mortality                   | 77            | 1.45 (1.15 – 1.82)             | 1.40 (1.11 – 1.77)                        |
| <b>MCP-1</b>                |               |                                |                                           |
| Kidney disease progression* | 182           | 1.33 (1.09 – 1.61)             | 1.31 (1.08 – 1.59)                        |
| ESKD                        | 124           | 1.47 (1.16 – 1.88)             | 1.43 (1.12 – 1.82)                        |
| Mortality                   | 84            | 1.36 (1.03 – 1.79)             | 1.28 (0.97 – 1.69)                        |
| <b>suPAR</b>                |               |                                |                                           |
| Kidney disease progression* | 176           | 1.08 (0.99 – 1.19)             | 1.09 (0.99 – 1.19)                        |
| ESKD                        | 122           | 1.11 (0.99 – 1.25)             | 1.13 (1.01 – 1.26)                        |
| Mortality                   | 82            | 1.08 (0.94 – 1.24)             | 1.08 (0.94 – 1.23)                        |

Model 3 is stratified by site and adjusted for age, sex, race, natural log transformed proteinuria, primary clinicopathologic diagnosis, and eGFR  
HR per doubling of biomarker

\*Kidney disease progression defined as  $\geq 40\%$  eGFR decline or ESKD

Abbreviations: IS, immunosuppression medications; CS, corticosteroids

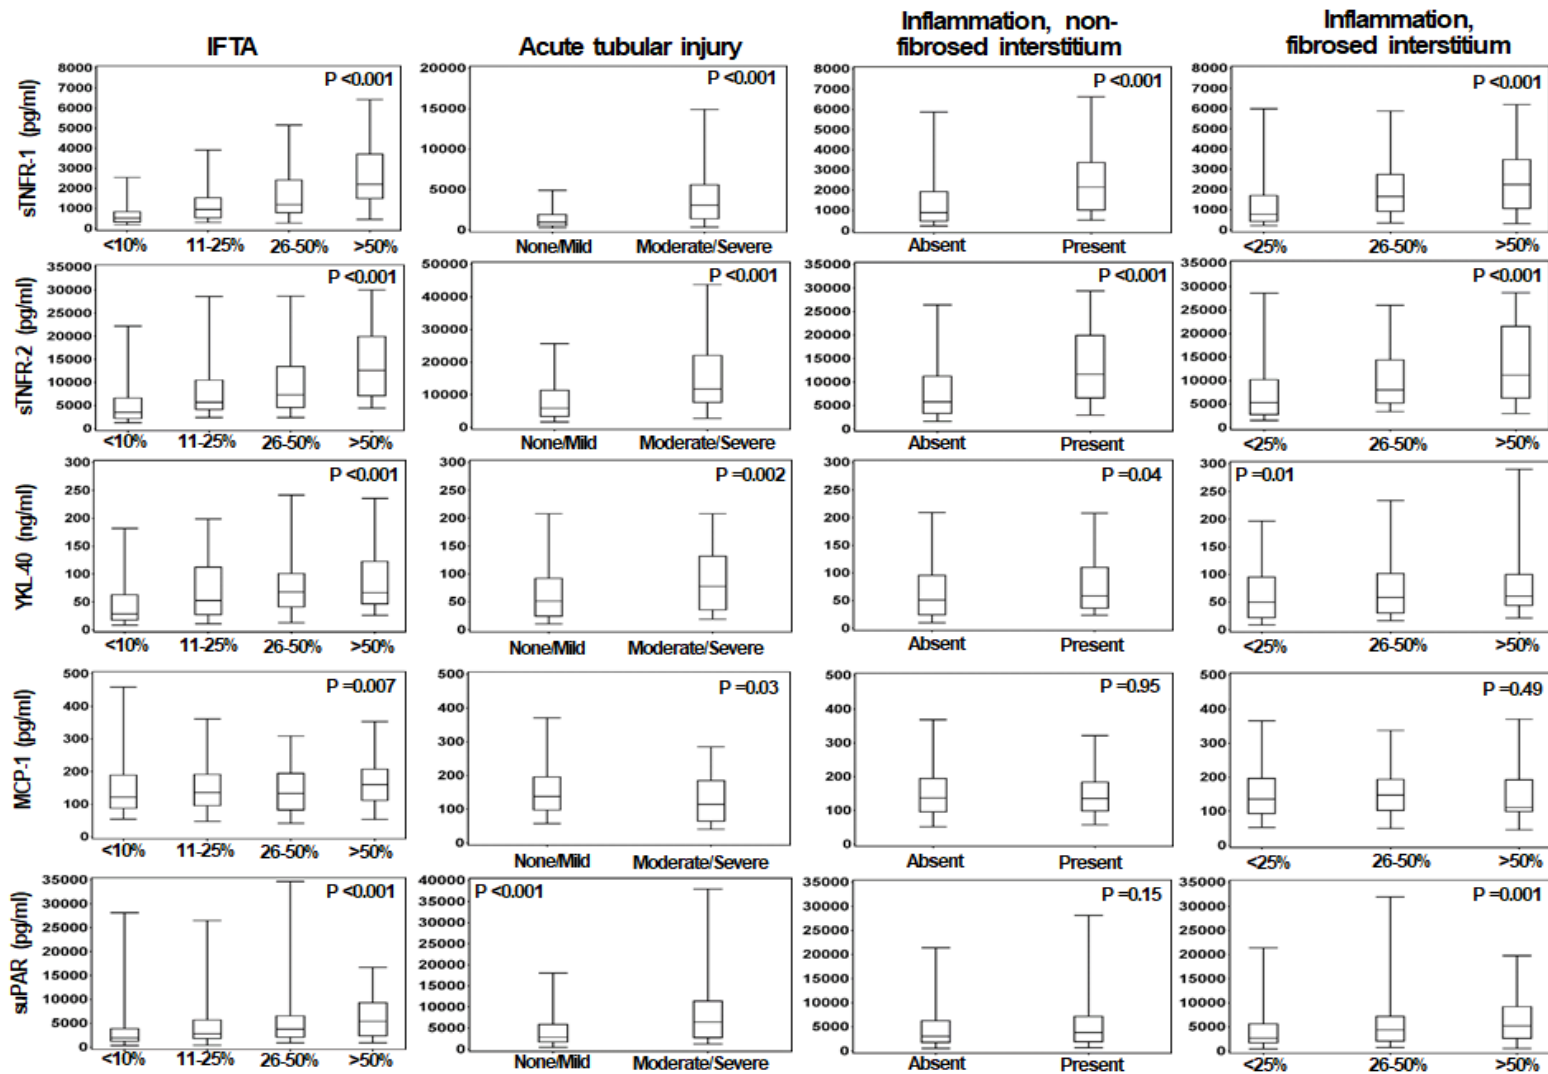

**Supplemental Figure 1. sTNFR-1, sTNFR-2, YKL-40, MCP-1, and suPAR associate with tubulointerstitial lesions**

Boxplots show differences between grades of adjudicated glomerular lesions and plasma inflammatory biomarkers. Boxes show median with interquartile range and whiskers represent 5% lower bound and 95% upper bound for each plasma inflammatory biomarker.



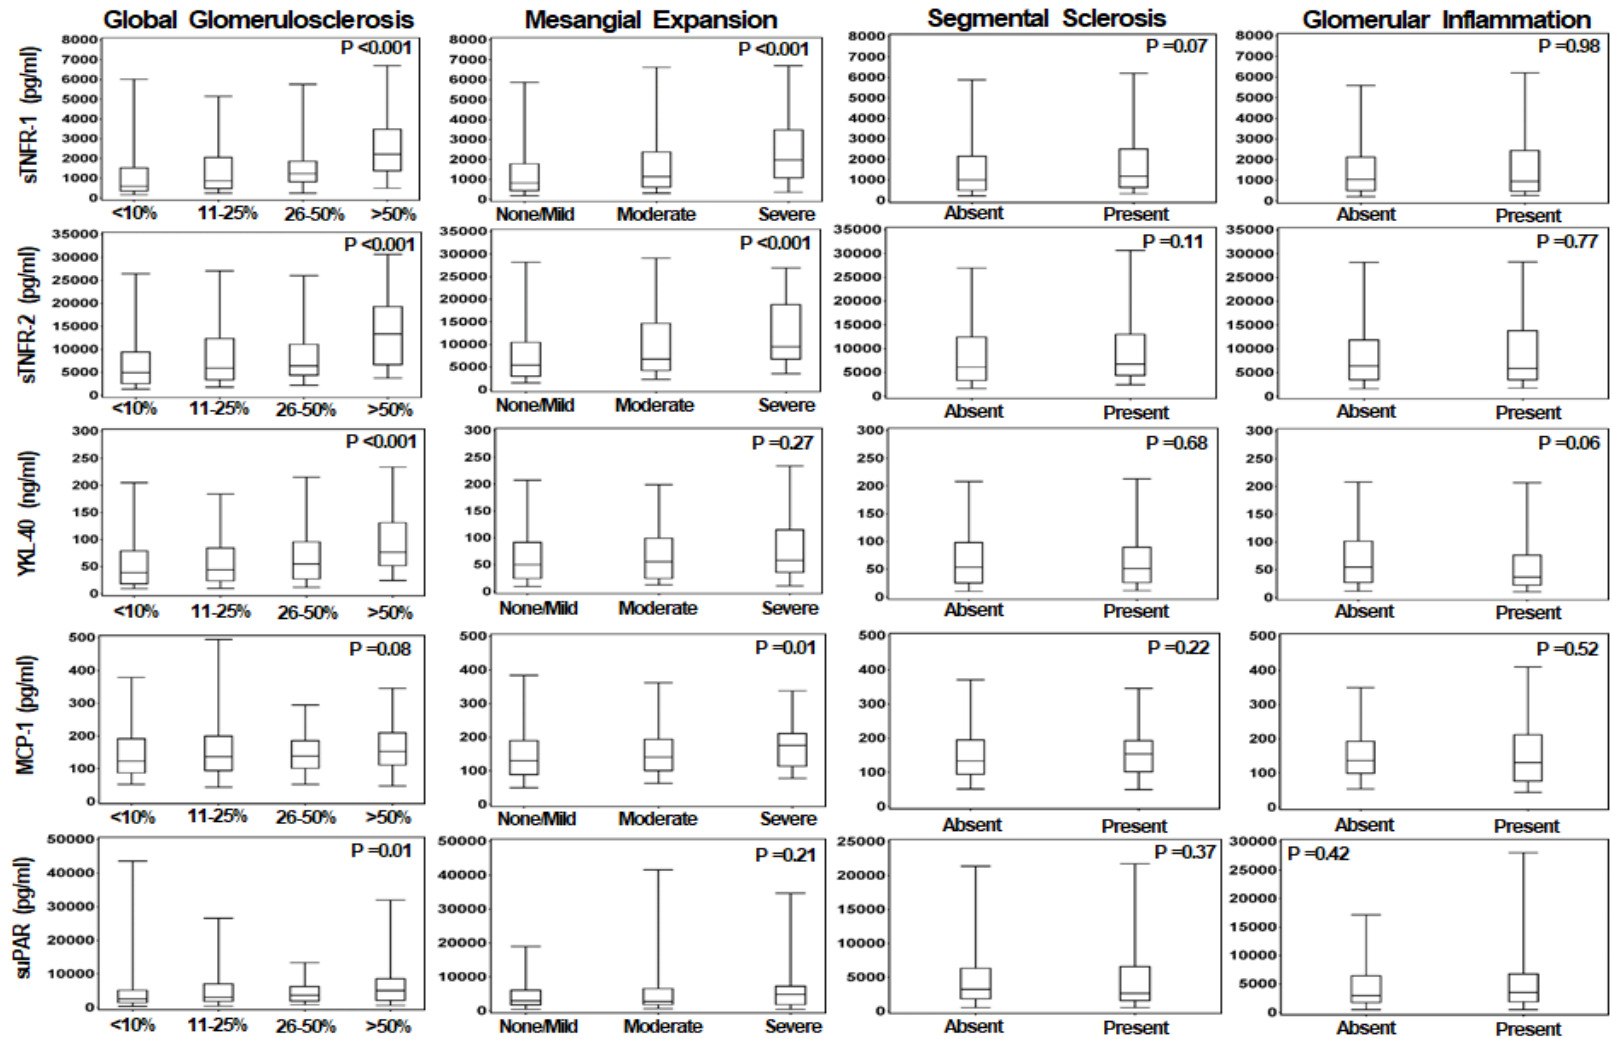

**Supplemental Figure 2. sTNFR-1, sTNFR-2, YKL-40, MCP-1, and suPAR associate with glomerular lesions**

Boxplots show differences between grades of adjudicated glomerular lesions and plasma inflammatory biomarkers. Boxes show median with interquartile range and whiskers represent 5% lower bound and 95% upper bound for each plasma inflammatory biomarker.

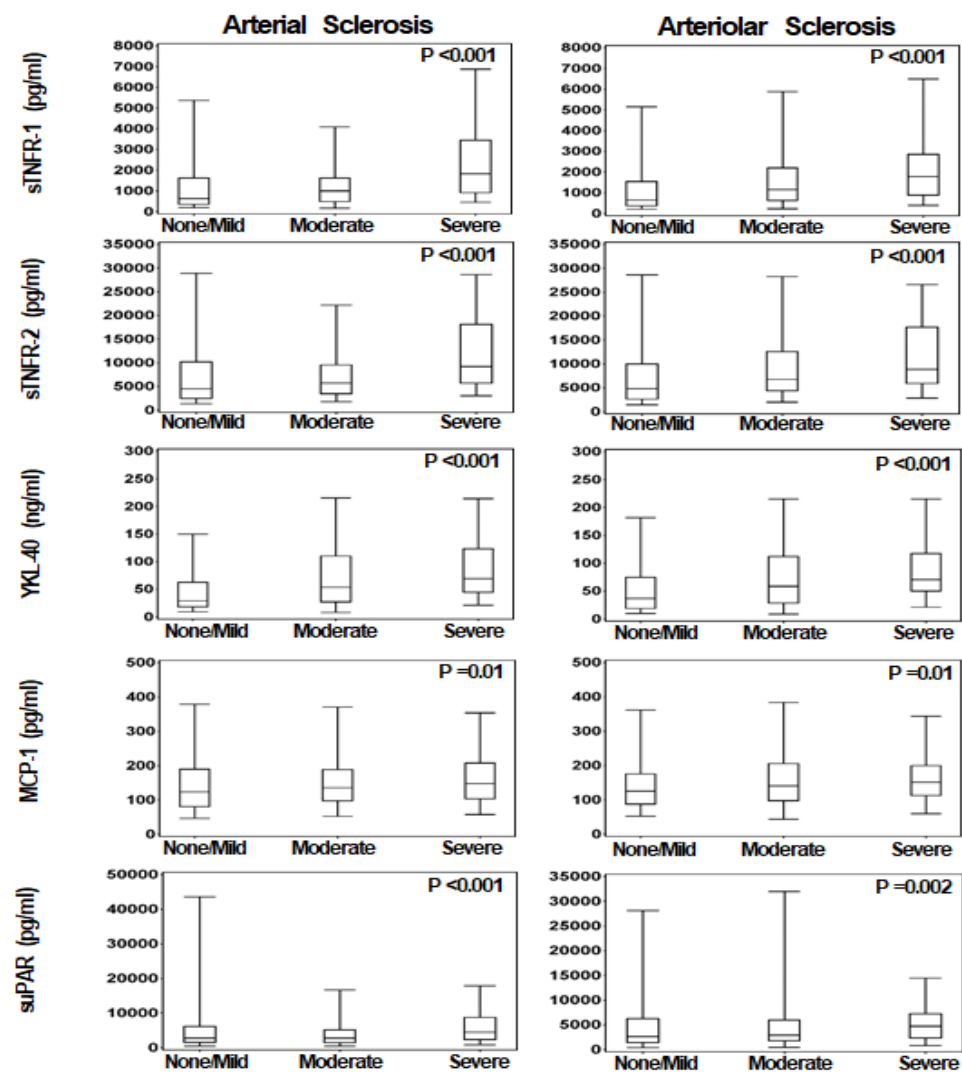

**Supplemental Figure 3. sTNFR-1, sTNFR-2, YKL-40, MCP-1, and suPAR associate with microvascular lesions**

Boxplots show differences between grades of adjudicated microvascular lesions and plasma inflammatory biomarkers. Boxes show median with interquartile range and whiskers represent 5% lower bound and 95% upper bound for each plasma inflammatory biomarker.
